# Supplementary figures and images for: Serum response factor binding sites differ in three human cell types
Source: HighWire-hosted journal article supplement (doi:10.1101/gr.5875007), 2007-01-02

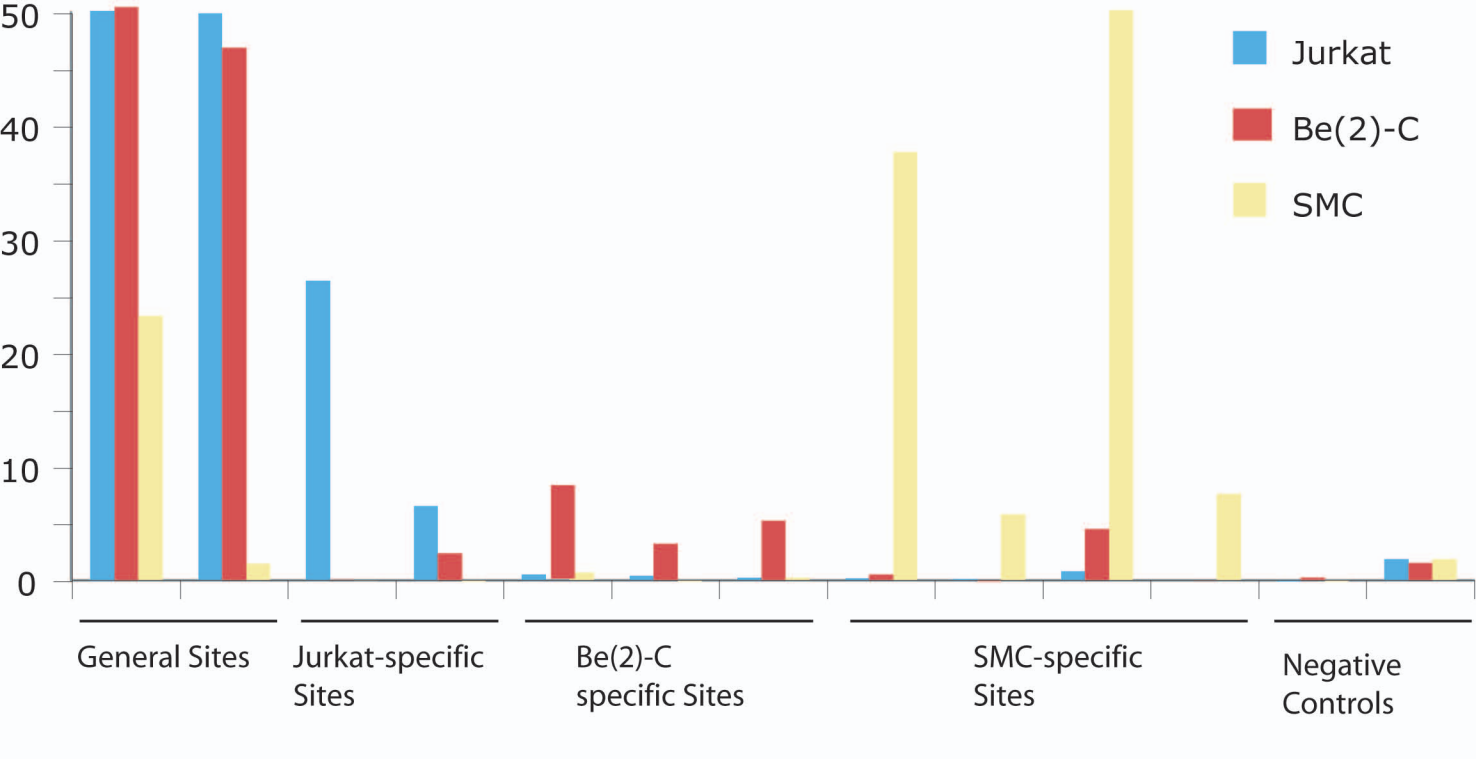

Supplement: Supplemental_Figure-Show_Tissue_Specificity-20061.10.05.pdf [file Supplemental_Figure-Show_Tissue_Specificity-20061.10.05.pdf]
